# Supplementary material for: Green recyclable SO3H-carbon catalyst for the selective synthesis of isomannide-based fatty acid monoesters as non-ionic bio-surfactants
Source: Royal Society of Chemistry journal article supplement (doi:10.1039/c5ra03605d), 2015-01-01

## **Green recyclable SO<sub>3</sub>H-carbon catalyst for the selective synthesis of isomannide-based fatty acid monoesters as non-ionic bio-surfactants**

**T. Vijai Kumar Reddy, G. Sandhya Rani, R.B.N. Prasad and B.L.A. Prabhavathi Devi\***

*Centre for Lipid Research, CSIR-Indian Institute of Chemical Technology, Uppal Road, Tarnaka, Hyderabad-500007, India.  
E-mail: prabhavathi@iict.res.in; Fax: +91 40 27193370; Tel: +91 40 27191845*

| <b>INDEX:</b>                                     | <b>Page No.</b> |
|---------------------------------------------------|-----------------|
| Gas Chromatogram.....                             | S2              |
| <sup>1</sup> H & <sup>13</sup> C NMR Spectra..... | S3-S14          |

# Gas Chromatogram of isomannide monooleate (3f)

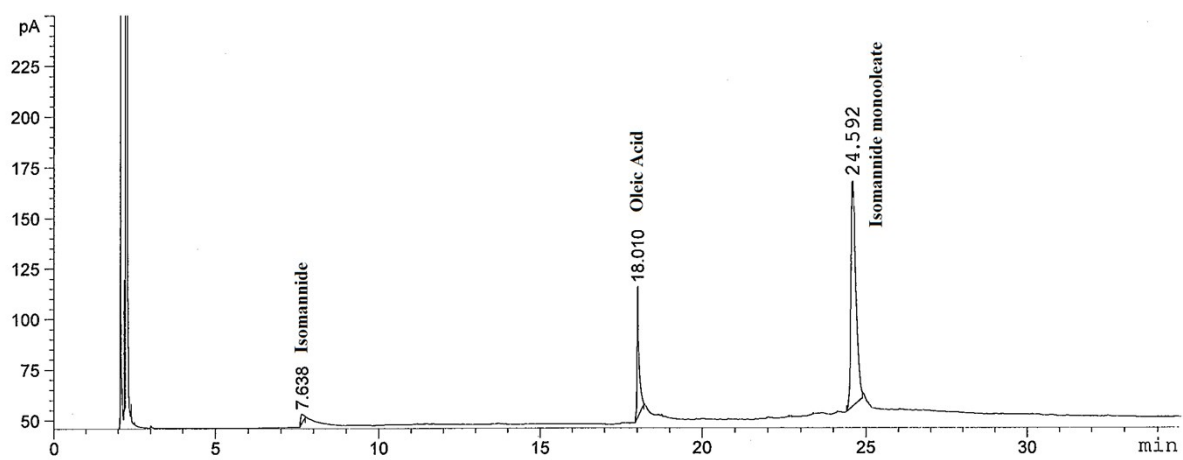

**<sup>1</sup>H NMR of isomannide monodecanoate (3a)**

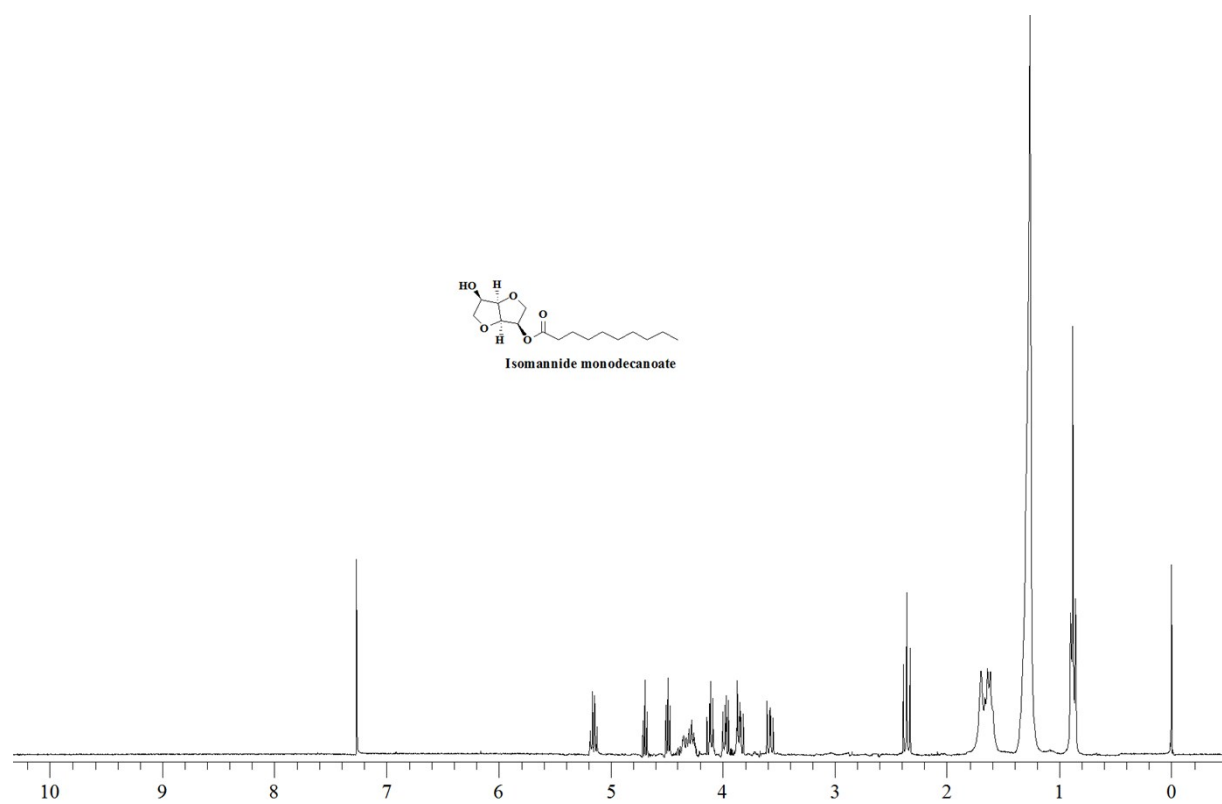

**$^{13}\text{C}$  NMR of isomannide monodecanoate (3a)**

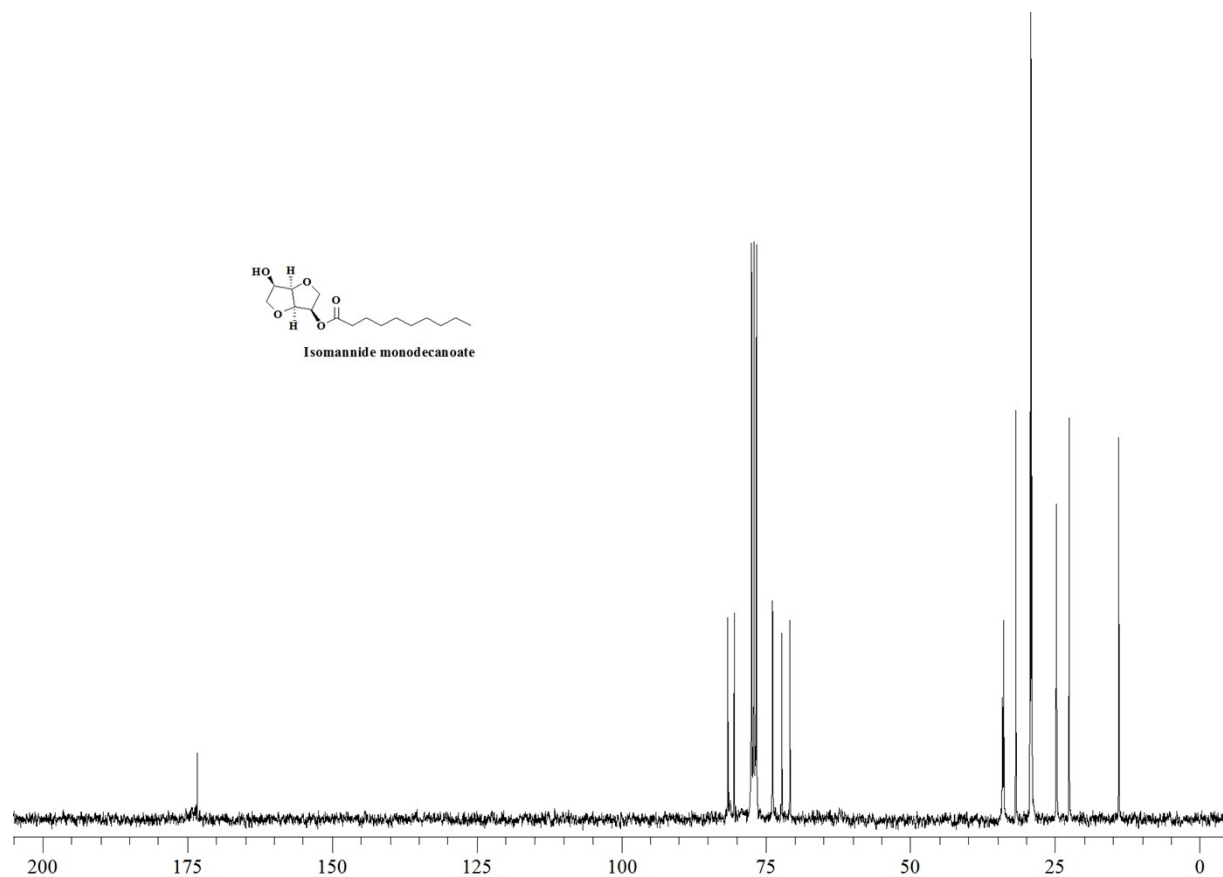

**<sup>1</sup>H NMR of isomannide monolaurate (3b)**

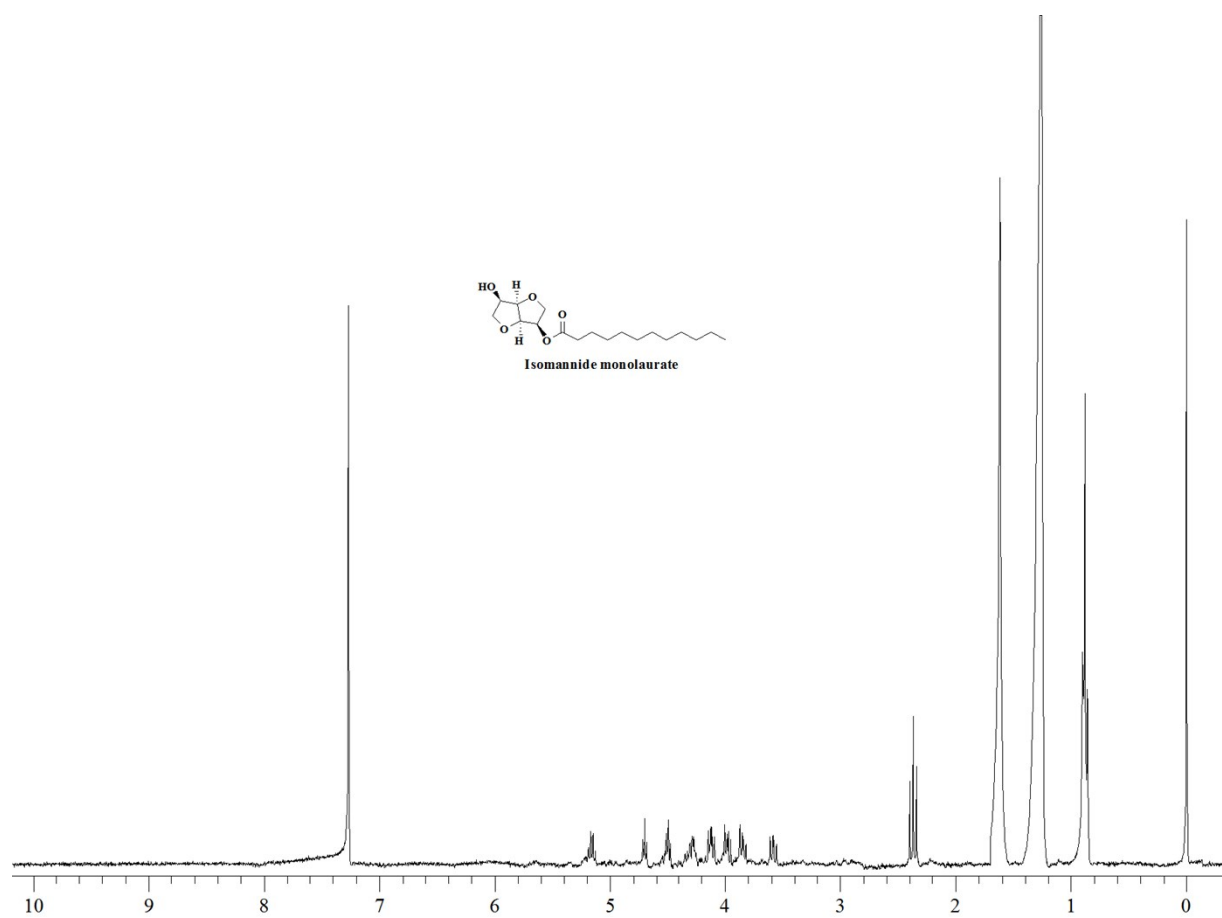

**<sup>13</sup>C NMR of isomannide monolaurate (3b)**

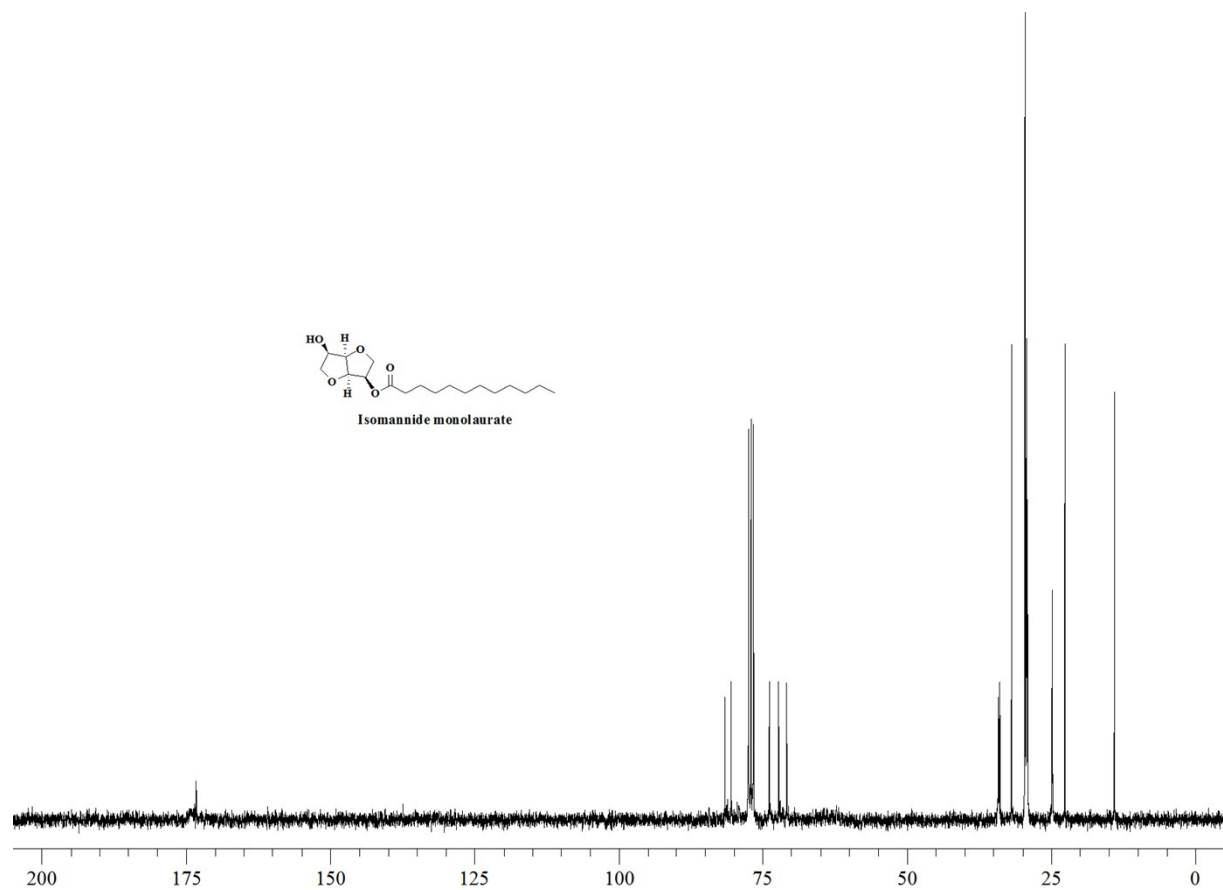

**<sup>1</sup>H NMR of isomannide monomyristate (3c)**

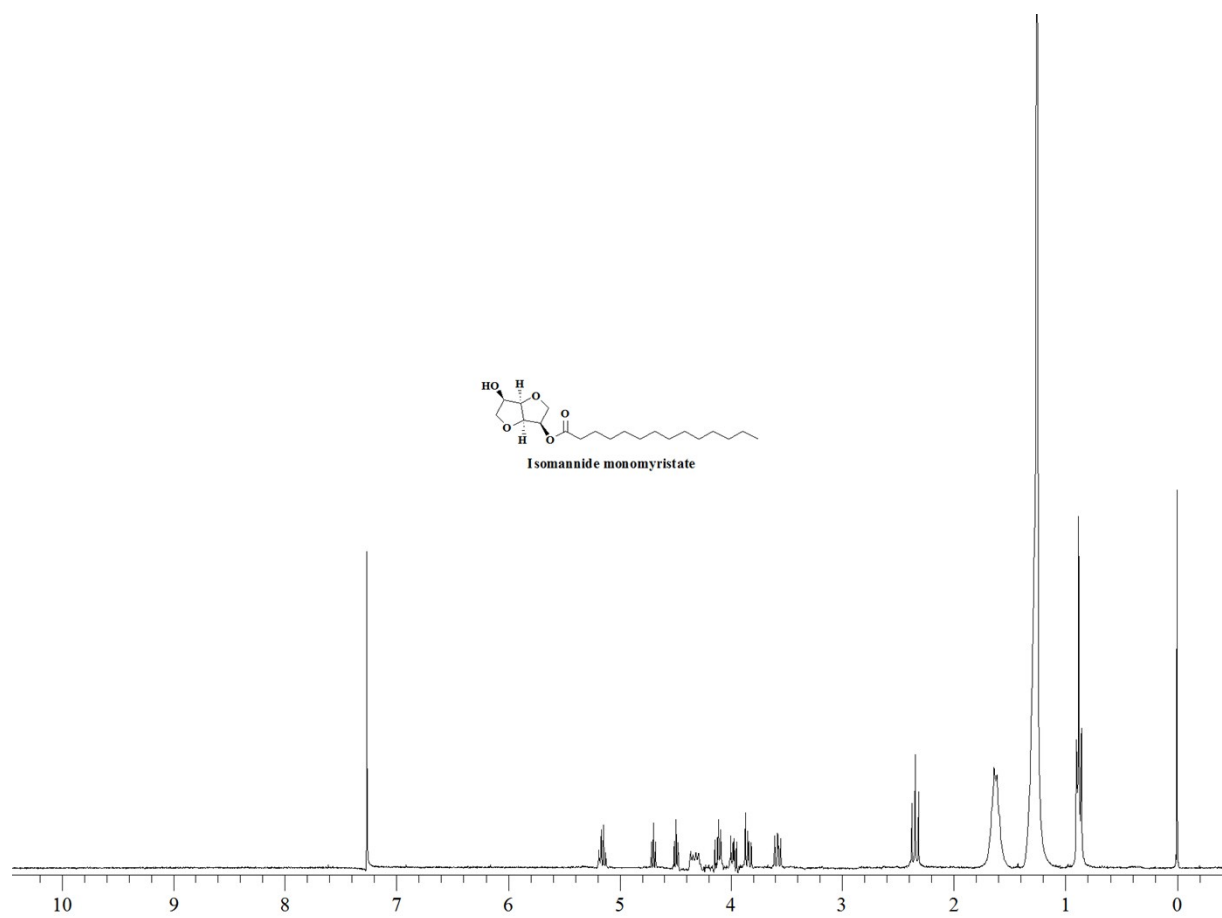

$^{13}\text{C}$  NMR of isomannide monomyristate (3c)

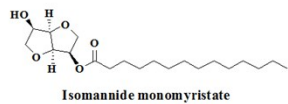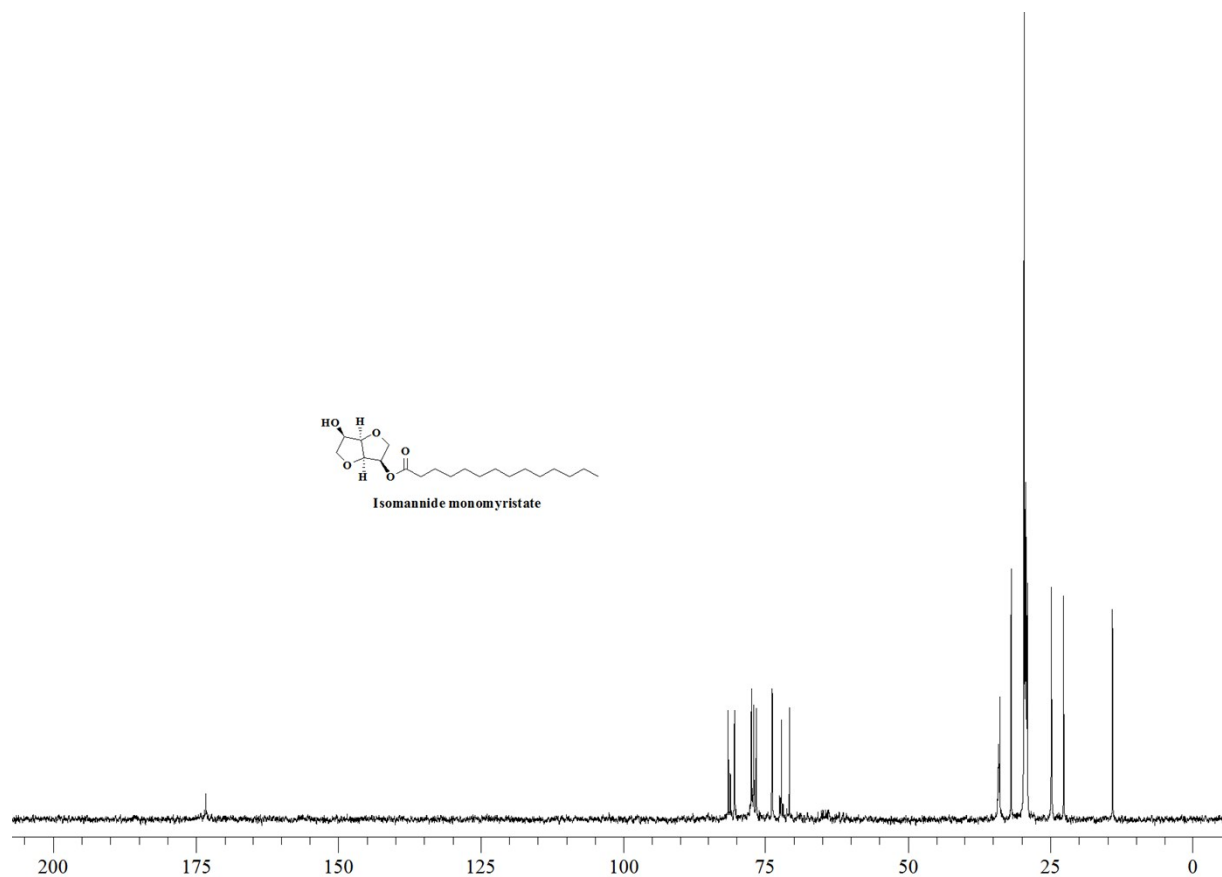



**<sup>1</sup>H NMR of isomannide monopalmitate (3d)**

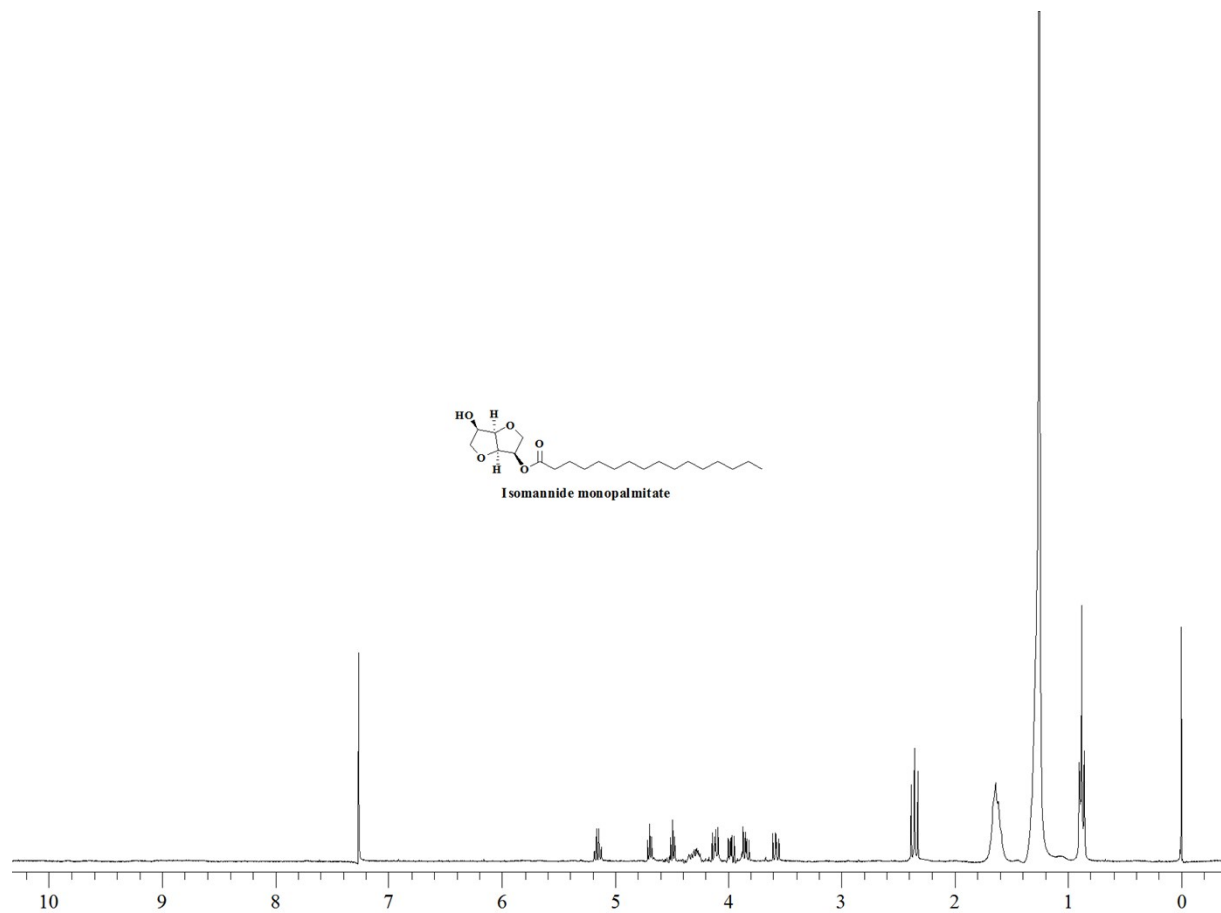

**<sup>13</sup>C NMR of isomannide monopalmitate (3d)**

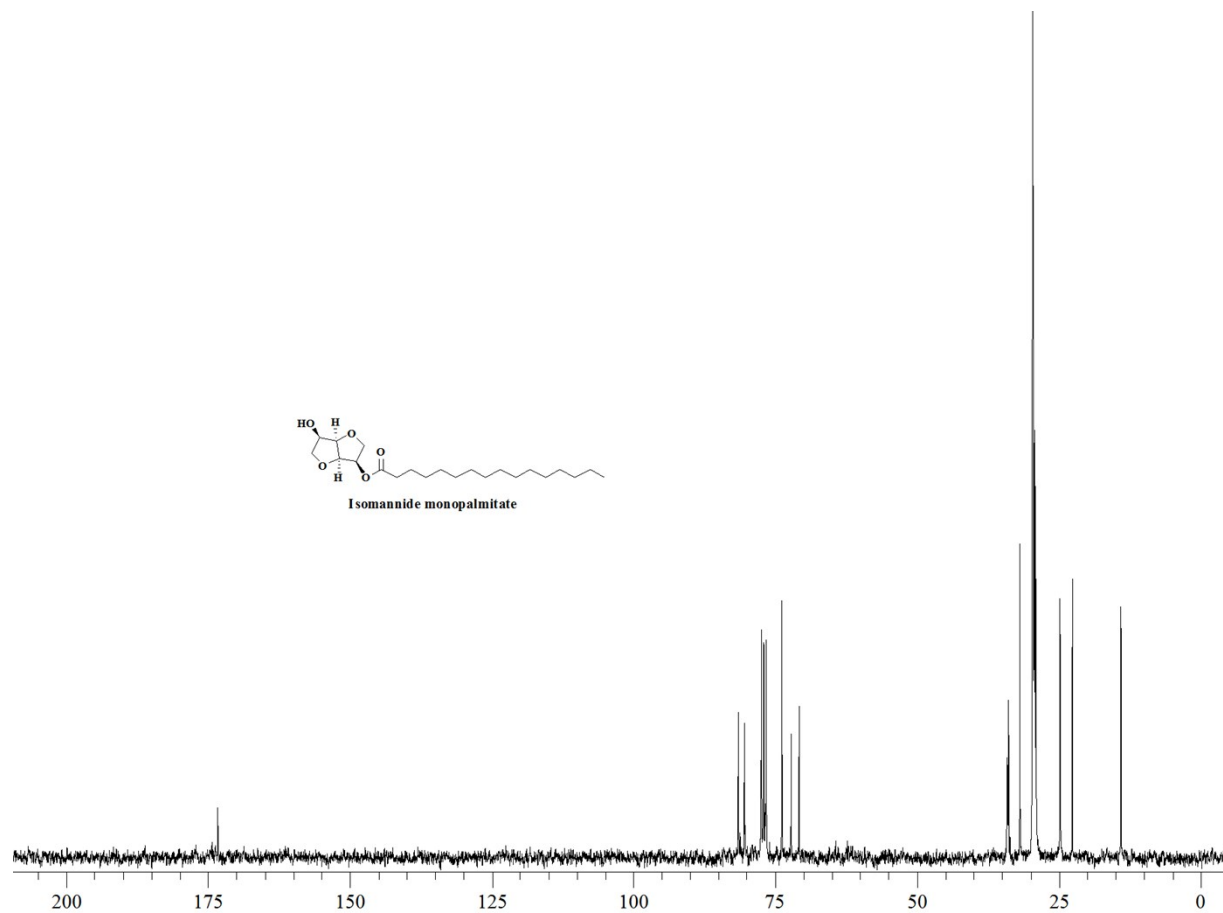

**<sup>1</sup>H NMR of isomannide monostearate (3e)**

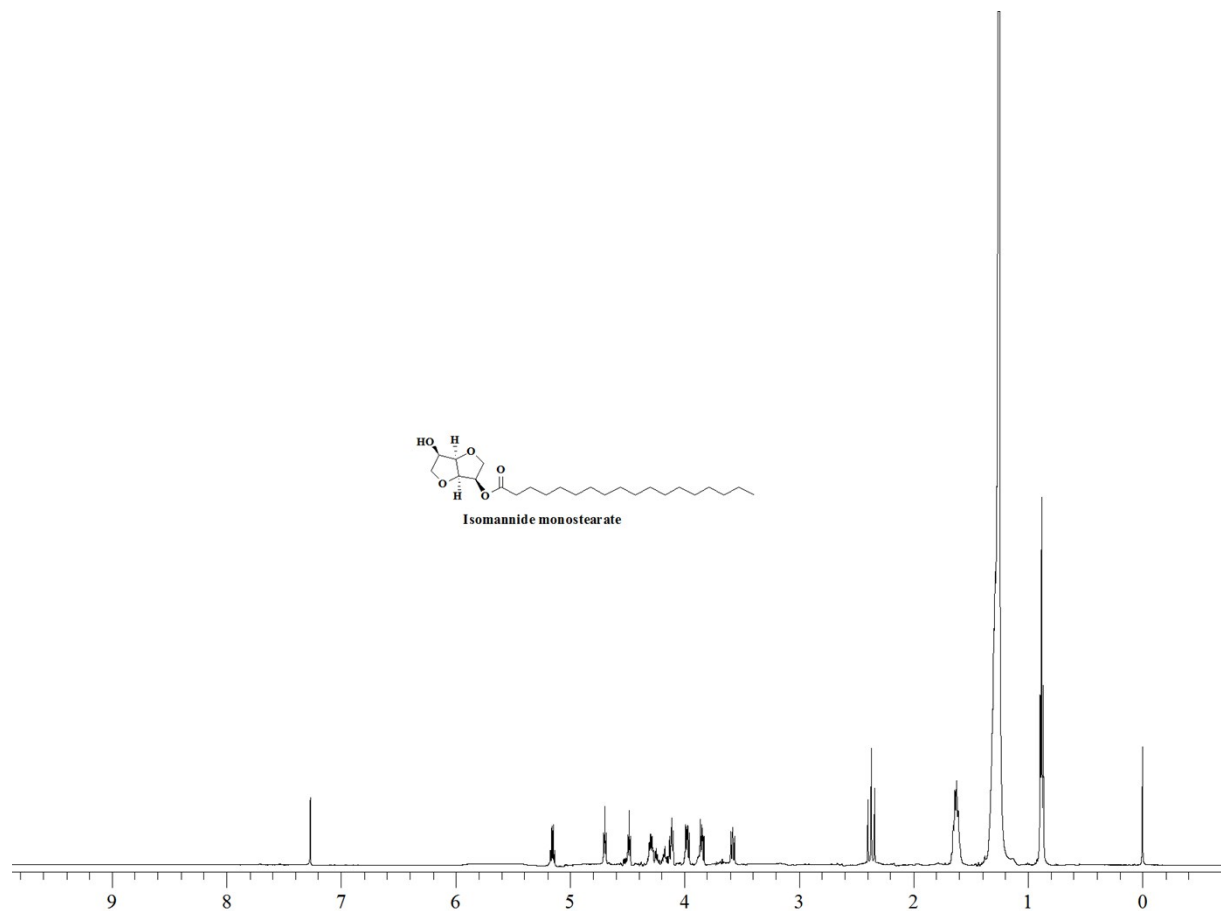

**$^{13}\text{C}$  NMR of isomannide monostearate (3e)**

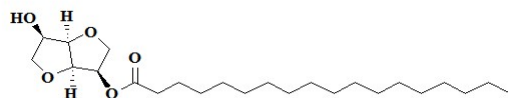

**Isomannide monostearate**

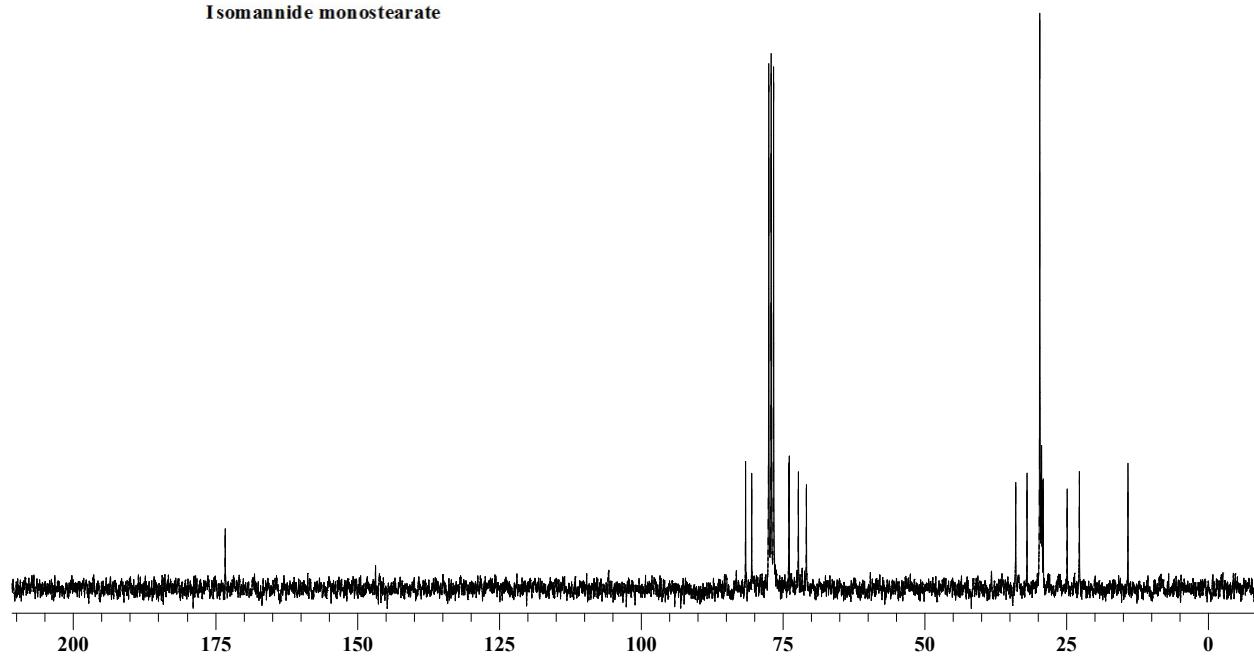

**<sup>1</sup>H NMR of isomannide monooleate (3f)**

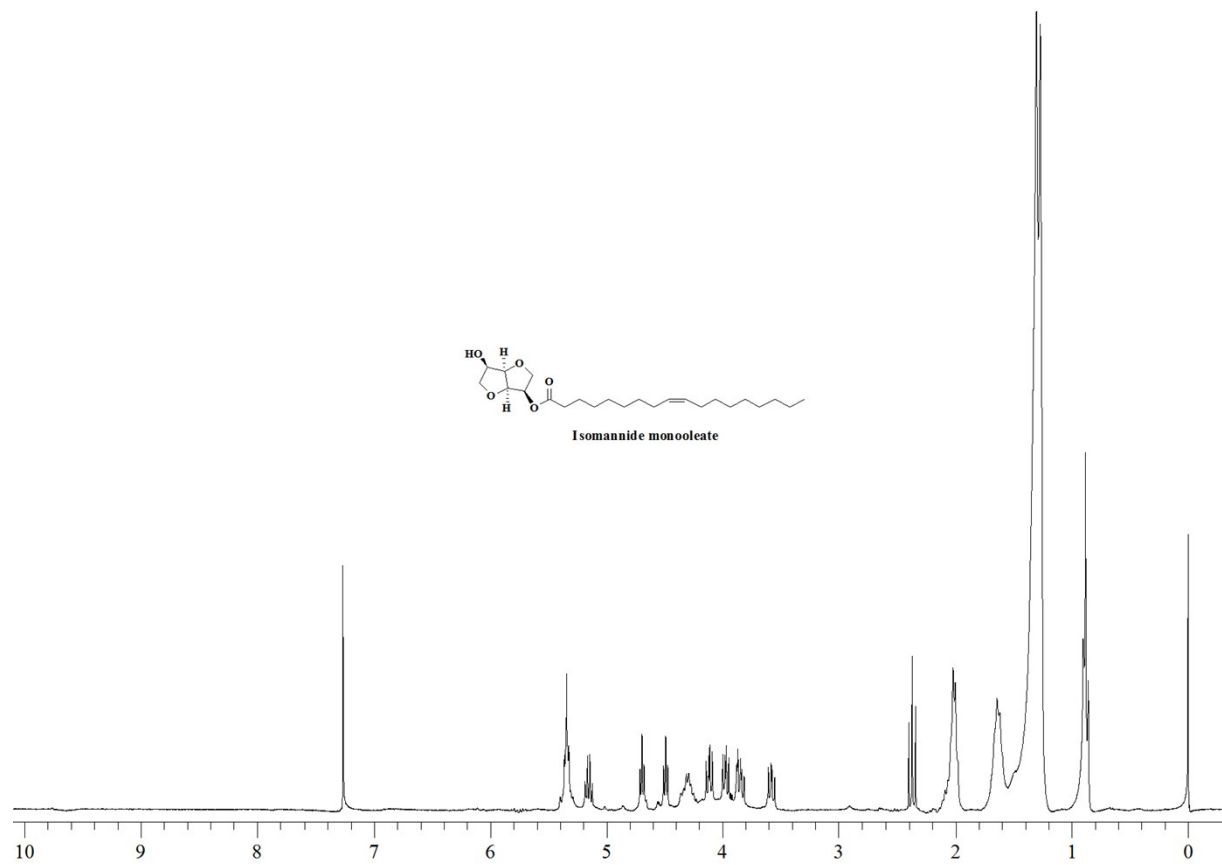

**<sup>13</sup>C NMR of isomannide monooleate (3f)**

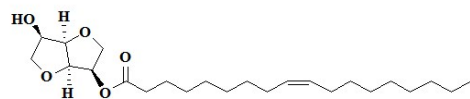

**Isomannide monooleate**

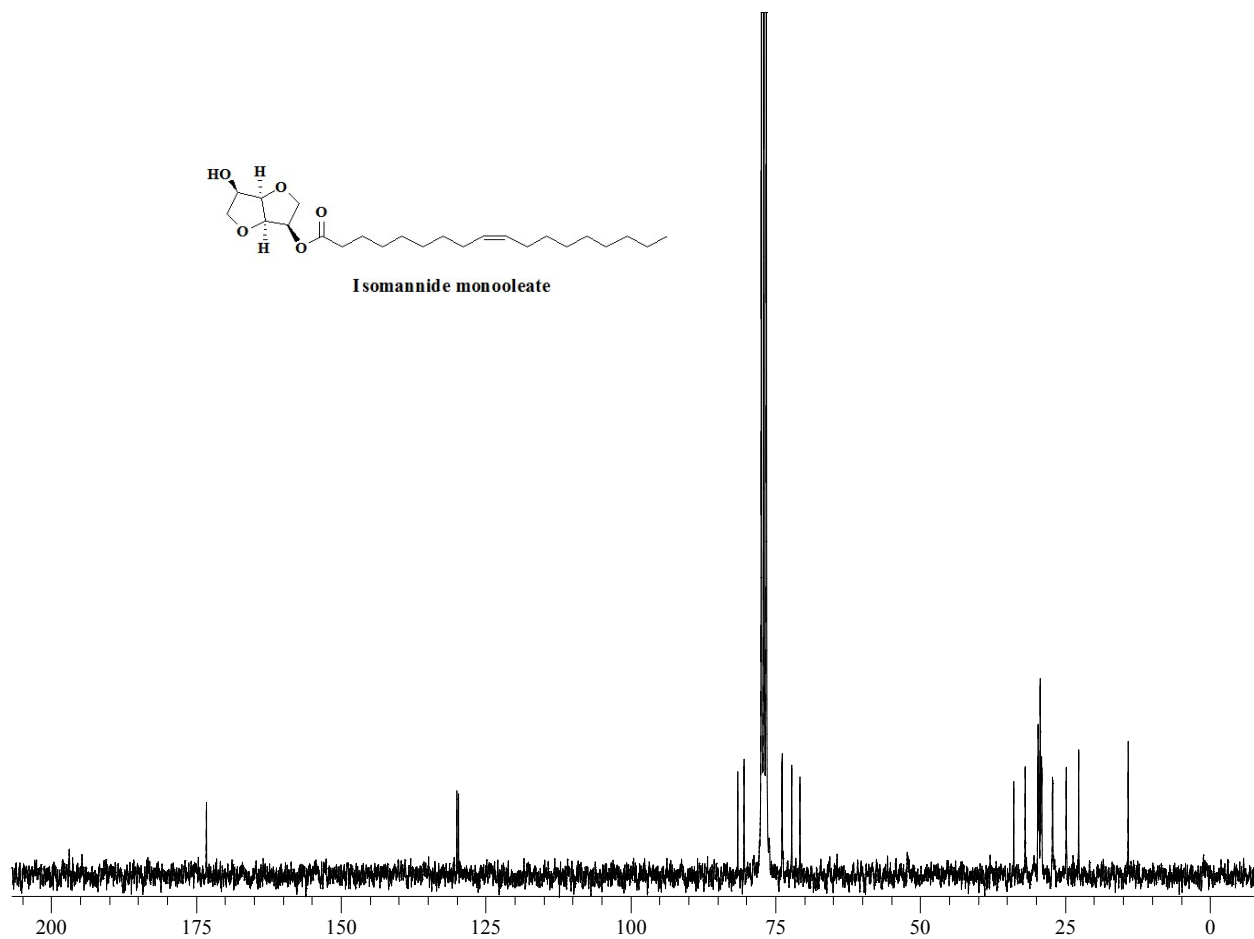

Supplement: c5ra03605d1.pdf [file c5ra03605d1.pdf]
